# Supplementary material
Source: MDPI journal article supplement (https://www.mdpi.com/2311-7524/9/2/128)
Supplement: s1 [file s1]

**Table S1.** The primer sequences used for the amplifications of the ACT and TEF1 $\alpha$  regions.

| Primer Name | Sequence (5'-3')      |
|-------------|-----------------------|
| EF1-728F    | ATCGAGAAGTTCGAGAAGG   |
| EF-2R       | GGARGTACCAGTSATCATGTT |
| ACT-512F    | ATGTGCAAGGCCGGTTTCGC  |
| ACT-783R    | TACGAGTCCTTCTGGCCCAT  |

**Table S2.** The reference sequences used for the ACT and TEF1 $\alpha$  phylogenetic trees.

| Species                             | Culture Accession Number | ACT        | TEF1 $\alpha$ |
|-------------------------------------|--------------------------|------------|---------------|
| <i>Cladosporium cladosporioides</i> | CBS 112388               | HM148490.1 | HM148244.1    |
| <i>Cladosporium cladosporioides</i> | CPC 11120                | HM148504.1 | HM148258.1    |
| <i>Cladosporium cladosporioides</i> | CPC 11121                | HM148505.1 | HM148259.1    |
| <i>Cladosporium cladosporioides</i> | CPC 13669                | HM148522.1 | HM148276.1    |
| <i>Cladosporium europaeum</i>       | CPC 14238                | HM148542.1 | HM148297.1    |
| <i>Cladosporium europaeum</i>       | CPC 14296                | HM148543.1 | HM148298.1    |
| <i>Cladosporium fusiforme</i>       | CBS 452.71               | EF101371.1 | –             |
| <i>Cladosporium fusiforme</i>       | CBS 119414               | KJ596640.1 | –             |
| <i>Cladosporium limoniforme</i>     | CPC 22394                | MF473985.1 | MF473564.1    |
| <i>Cladosporium ramotenellum</i>    | CBS 121628               | EF679538.1 | EF679462.1    |
| <i>Cladosporium ramotenellum</i>    | CPC 19119                | MF474080.1 | MF473653.1    |
| <i>Cladosporium sphaerospermum</i>  | CBS 193.54               | EU570269.1 | EU570261.1    |
| <i>Cladosporium sphaerospermum</i>  | CPC 12476                | EU570271.1 | EU570264.1    |
| <i>Cladosporium sphaerospermum</i>  | CPC 13368                | EU570272.1 | EU570265.1    |
| <i>Cercospora beticola</i>          | CBS 116456               | AY840458.1 | AY840494.1    |
| <i>Cladosporium fusiforme</i>       | EXF 449                  | EF101372.1 | JN906988.1    |
| <i>Cladosporium aciculare</i>       | CBS 140488               | KT600607.1 | KT600509.1    |
| <i>Cladosporium velox</i>           | CPC 22359                | MF474158.1 | MF473731.1    |
| <i>Cladosporium coloradense</i>     | CPC 22238                | MF473795.1 | MF473372.1    |

**Table S3.** The number of raspberries inoculated for the 2020 stigmata infection study at each inoculation date.

| Inoculation Date | Sterilised | Fruit Stage | N   |
|------------------|------------|-------------|-----|
| 09/09/2020       | Sterile    | Green       | 379 |
| 09/09/2020       | Unsterile  | Green       | 172 |
| 09/09/2020       | Sterile    | Ripening    | 57  |
| 09/09/2020       | Unsterile  | Ripening    | 55  |
| 09/09/2020       | Sterile    | Ripe        | 34  |
| 09/09/2020       | Unsterile  | Ripe        | 94  |
| 16/09/2020       | Sterile    | Green       | 277 |
| 16/09/2020       | Unsterile  | Green       | 89  |
| 16/09/2020       | Sterile    | Ripening    | 73  |
| 16/09/2020       | Unsterile  | Ripening    | 45  |
| 16/09/2020       | Sterile    | Ripe        | 45  |
| 16/09/2020       | Unsterile  | Ripe        | 40  |
| 23/09/2020       | Sterile    | Green       | 201 |

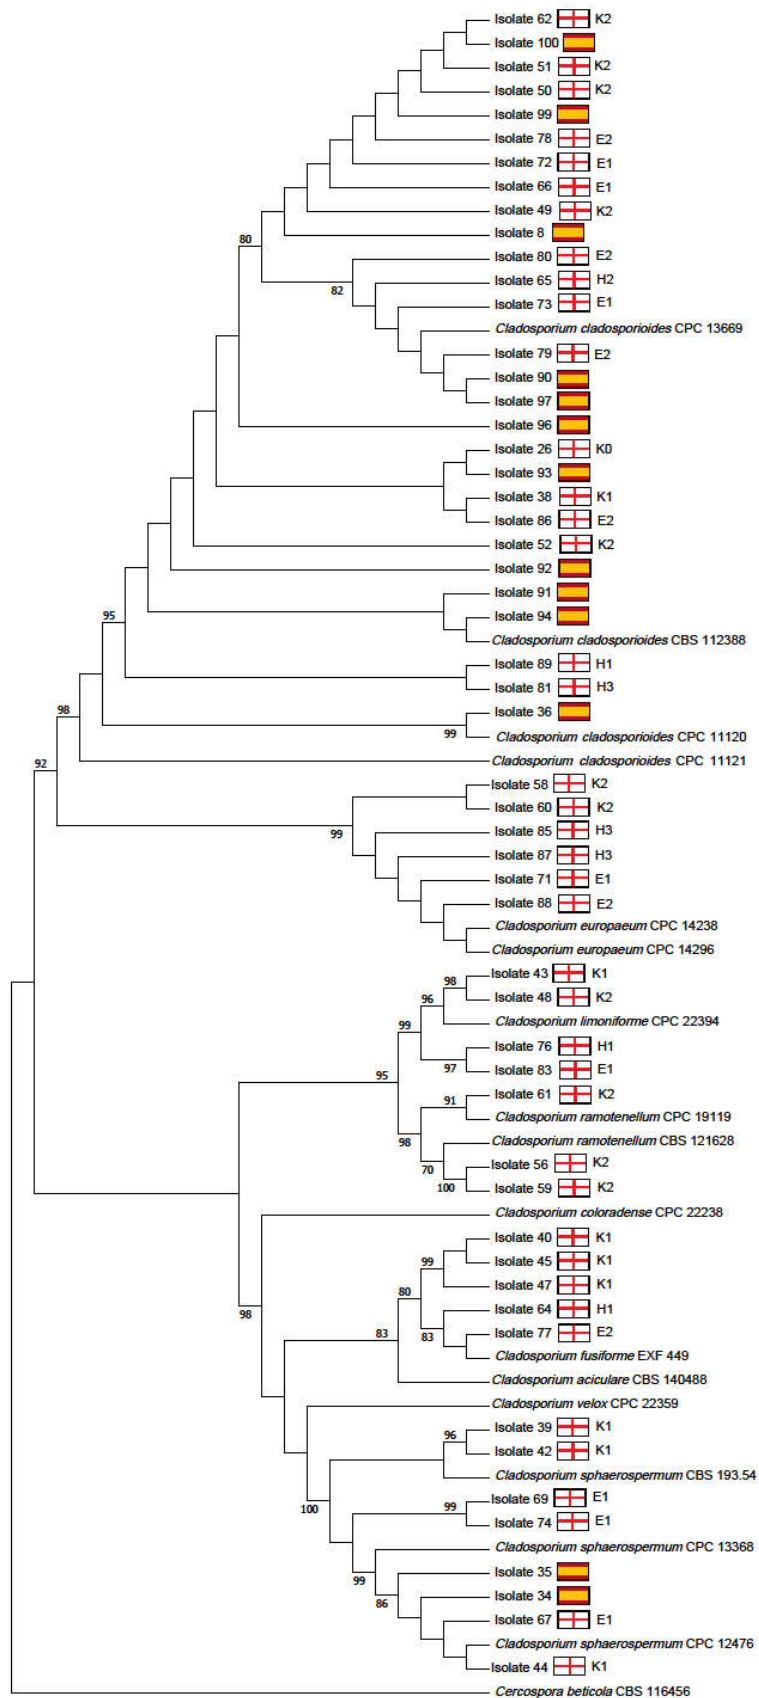

**Figure S1.** A phylogenetic tree of the TEF1 $\alpha$  gene for 70 isolates of *Cladosporium*. The tree was created using maximum likelihood with a Kimura 2-parameter evolutionary model and 1000 bootstrap replications. The numbers above branches represent bootstrap values. The flags represent the country of origin, the codes represent areas within the country and numbers denote different farms. Area codes are as follows: E = Essex, K = Kent, H = Herefordshire.
